# Supplementary material for: Syn-thrusting, near-surface flexural-slipping and stress deflection along folded sedimentary layers of the Sant Corneli-Bóixols Anticline (Pyrenees, Spain)
Source: Copernicus journal article supplement (doi:10.5194/se-2017-2), 2017-01-17

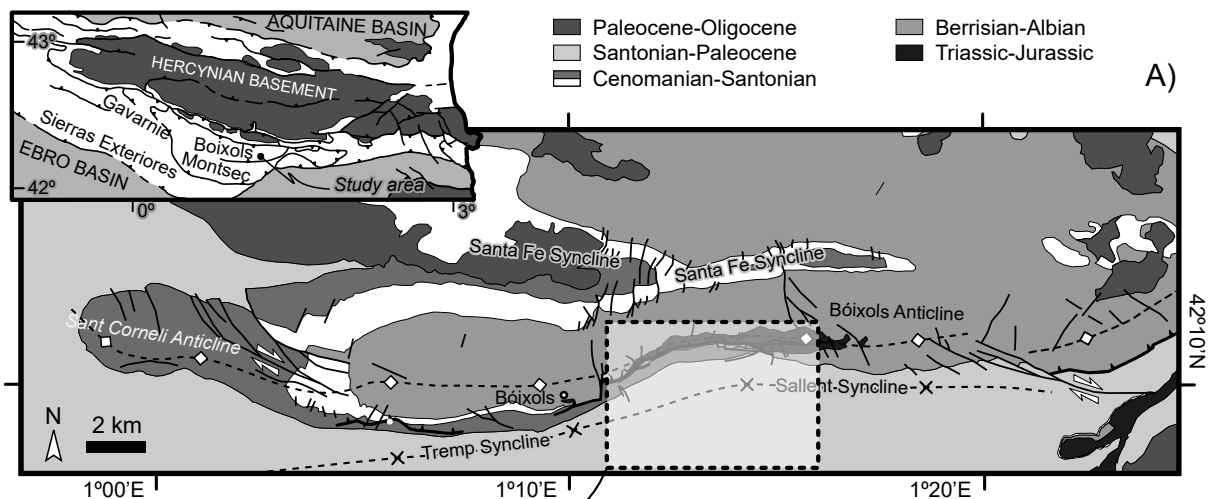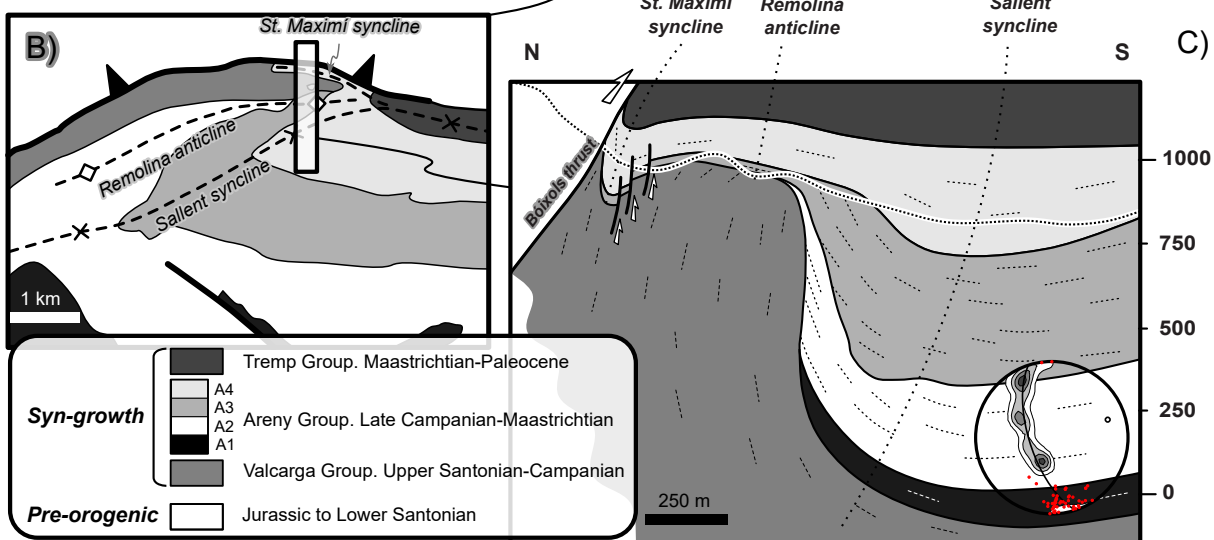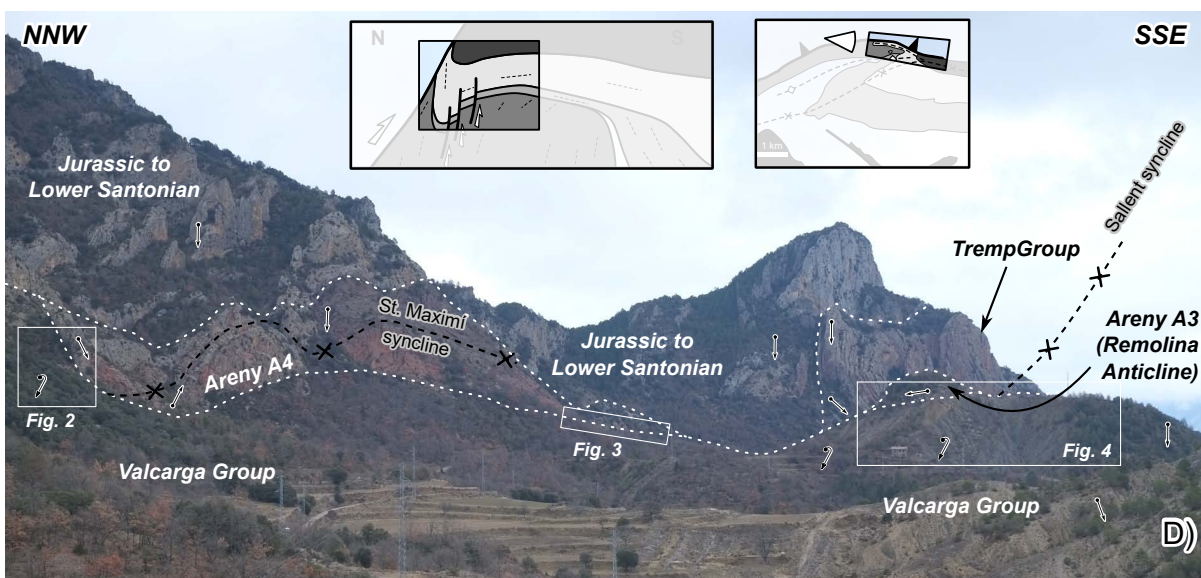

Supplement: Supplementary file [file Fig 1.pdf › Fig 1.pdf]
