# Supplementary material for: Syn-thrusting, near-surface flexural-slipping and stress deflection along folded sedimentary layers of the Sant Corneli-Bóixols Anticline (Pyrenees, Spain)
Source: Copernicus journal article supplement (doi:10.5194/se-2017-2), 2017-01-17

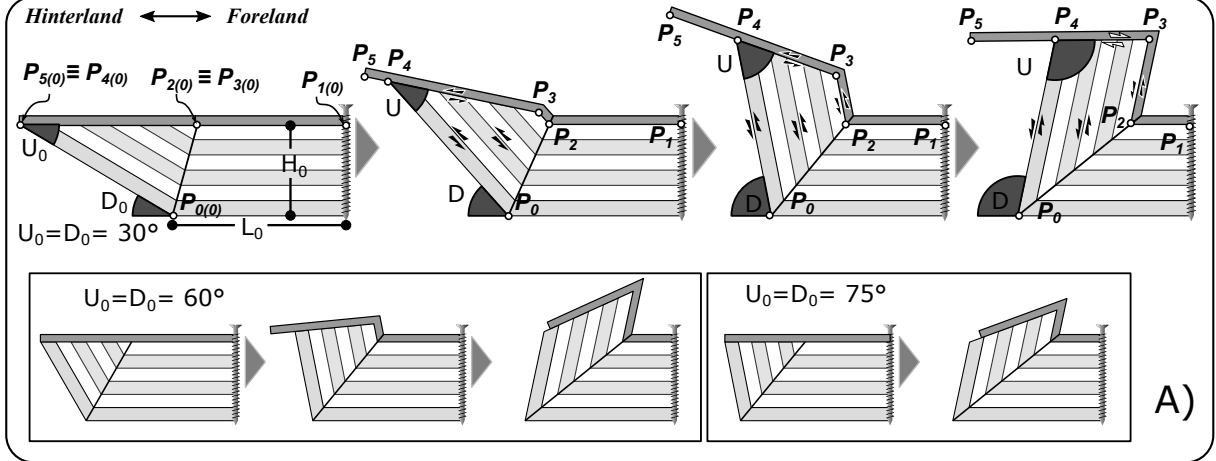

|                | X                                           | Y                                    |
|----------------|---------------------------------------------|--------------------------------------|
| $P_0 = P_0(0)$ | $-L_0$                                      | $-H_0$                               |
| $P_1 = P_1(0)$ | 0                                           | 0                                    |
| $P_2$          | $-L_0 + H_0 \cdot \tan(D/2)$                | 0                                    |
| $P_3$          | $P_2 \cdot X - P_3 \cdot P_2 \cdot \cos(D)$ | $P_3 \cdot P_2 \cdot \sin(D)$        |
| $P_4$          | $-L_0 - P_4 \cdot P_0 \cdot \cos(D)$        | $-H_0 + P_4 \cdot P_0 \cdot \sin(D)$ |

$\overline{P_3 P_2} + \overline{P_2 P_1} = \overline{P_2(0) P_1(0)}$   
 $\overline{P_3 P_2} = H_0 \cdot [\tan(D/2) - \tan(D_0/2)]$   
 $\overline{P_4 P_0} = H_0 \cdot [\tan(D_0/2) + \cot(D_0)]$   
 $\overline{P_4 P_3} = H_0 \cdot \sin(U)$   
 $\overline{P_5 P_4} = \overline{P_4(0) P_1(0)} - \overline{P_4 P_3} - \overline{P_3 P_2} - \overline{P_2 P_1}$   
 $\overline{P_5 P_4} = \overline{P_4 P_0} \cdot \cos(D_0) + H_0 \cdot \tan(D_0/2) - \overline{P_4 P_3}$   
 $\frac{d(\overline{P_5 P_4})}{d(D)} = \frac{d(\overline{P_4 P_3})}{d(D)} = H_0 \cdot \frac{d(\sin(U))}{d(D)}$

$\Delta S = \overline{P_5 P_4}$   
 $U = D - \left[ \arctan \left( \frac{P_4 \cdot Y - P_3 \cdot Y}{P_4 \cdot X - P_3 \cdot X} \right) \right]$

B)

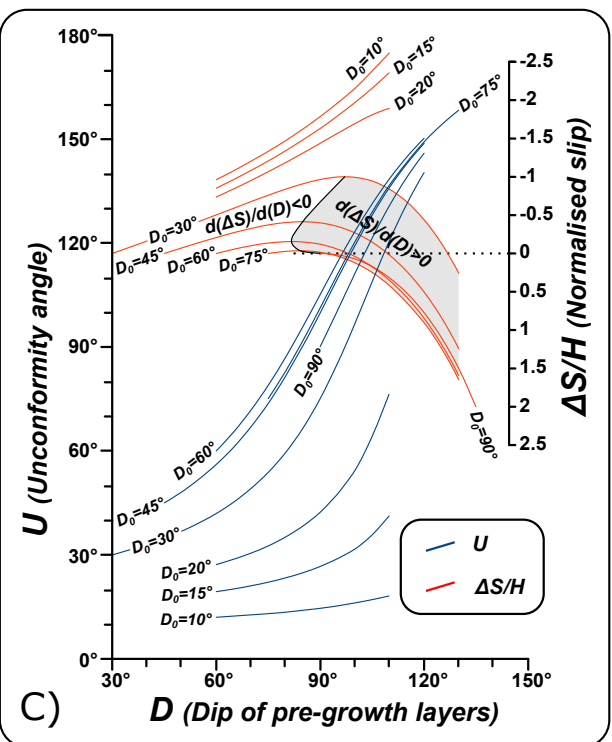

Supplement: Supplementary file [file Fig 6.pdf › Fig 6.pdf]
