# Supplementary material for: Syn-thrusting, near-surface flexural-slipping and stress deflection along folded sedimentary layers of the Sant Corneli-Bóixols Anticline (Pyrenees, Spain)
Source: Copernicus journal article supplement (doi:10.5194/se-2017-2), 2017-01-17
Supplement: Supplementary file [file Tavani et al_2017 R1_Marked.pdf › Tavani et al_2017 R1_Marked.pdf]

1 **Syn-thrusting, near-surface flexural-slipping and stress deflection along folded sedimentary**  
2 **layers of the Sant Corneli-Bóixols Anticline (Pyrenees, Spain).**

3 Tavani S.<sup>1</sup>, Granado P.<sup>2,3</sup>, Arbués P.<sup>2,3</sup>, Corradetti A.<sup>1</sup>, Muñoz, J.A.<sup>2,3</sup>

4 1- DiSTAR, Università degli Studi di Napoli “Federico II”, Largo S. Marcellino 10, 80138 Naples, Italy

5 2 - Institut de Recerca Geomodels, Universitat de Barcelona, Martí i Franquès s/n, 08028 Barcelona, Spain

6 3 - Departament de Dinàmica de la Terra i de l'Oceà, Universitat de Barcelona, Martí i Franquès s/n, 08028 Barcelona,  
7 Spain

8 Keywords: Growth strata; thrust-related anticline; stress; unconformity; flexural-slip.

9 **Abstract**

10 In the Spanish Pyrenees the Sant Corneli-Bóixols thrust-related anticline displays an  
11 outstandingly preserved growth strata sequence. These strata lie on top of a major unconformity  
12 exposed at the anticline's forelimb that divides and decouples a lower pre-folding unit from an  
13 upper syn-folding one. The former consists of steeply-dipping to overturned strata with widespread  
14 bedding-parallel [shearsslip](#) indicative of folding by flexural-slip, whereas the syn-folding strata  
15 above define a 200-m amplitude [S-shaped](#) fold. In the inner and outer sectors of the forelimb, both  
16 pre- and syn-folding strata are near-vertical to overturned and the unconformity angle ranges from  
17 10° to 30°. In the central portion of the forelimb, syn-folding layers are [shallowlygently](#)-dipping,  
18 whereas the angular unconformity is about 90° and the unconformity surface displays strong S-C  
19 shear structures, which provide a top-to-the foreland [shear](#)[slip](#) sense. This sheared unconformity is  
20 offset by steeply-dipping faults which are at low angles to the underlying layers of the pre-folding  
21 unit. Strong shearing along the unconformity surface also occurred in the inner sector of the  
22 forelimb with S-C structures providing an opposite, top-to-the hinterland, [shear](#)[slip](#) sense. Cross-  
23 cutting relationships and [shear](#)[slip](#) senses along the pre-folding bedding surfaces and the  
24 unconformity indicate that regardless of its orientation, layering in the pre- and syn-folding  
25 sequences of the Sant Corneli-Bóixols anticline was continuously [shearedslipped](#). This  
26 [shearingslipping](#) promoted an intense stress deflection, with the maximum component of the stress  
27 tensor remaining at low angles to bed[dings](#) during most of the folding process.

## 29 1. Introduction

30 Templates used to describe the state of stress of growing regional-scale thrust-related anticlines (e.g.  
 31 Hancock, 1985; Lisle, 1994; Fischer and Wilkerson, 2000; Belayneh and Cosgrove, 2004; Tavani et  
 32 al., 2015), typically integrate punctual strain data (e.g. Engelder and Geiser, 1980; Laubach, 1989;  
 33 Lacombe, 2012; Balsamo et al., 2016) and indirect information provided by the large-scale  
 34 geometry of the structure, such as like curvature or strata thinning/thickening (e.g. Price and  
 35 Cosgrove, 1990). Widespread documentation of bedding-parallel slip, along with the **broad**  
 36 preservation of layer thickness, provide key information ~~to model~~for modelling the distribution of  
 37 stress in actively growing anticlines. These observations indicate flexural-slip folding in the  
 38 multilayered portions of reservoir-scale thrust-related folds (e.g. Donath and Parker, 1964; Ramsay;  
 39 1967; Tanner, 1987; Suppe, 1983; Fowler, 1996; Erslev and Mayborn, 1997). The  
 40 assumption/observation of flexural-slipping has important consequences ~~on~~for the stress  
 41 distribution:

- 42 | - ~~ShearingSlipping~~ along numerous bedding surfaces **within** a wide range of bedding dip, is  
 43 possible only where the bedding surfaces have a low friction and a low cohesion.
- 44 | - On the other hand, the reactivation of these closely spaced low friction surfaces should  
 45 prevent the layer-parallel shear stress to exceed a certain value, which in turn  
 46 ~~imposes~~constrains the direction of the maximum component of the stress field to be at low  
 47 angle to bedding, i.e. at low angle to the ~~shearingslipping~~ surface (Wiltschko et al., 1985;  
 48 Ohlmacher and Aydin, 1997; Tavani et al., 2015).

49 | The process of layer-parallel ~~shearingslipping~~ is, however, discontinuous in time and space, so that  
 50 it is unclear whether the regional stress reorients only locally or, rather, the layer-parallel slipping is  
 51 sufficiently dense, both in time and space, to promote the reorientation of the stress in wide -  
 52 actively folding - areas. Field documentations are in agreement with the second hypothesis, i.e. that  
 53 ~~shearingslipping~~ along low-friction bedding surfaces promotes deflection of the principal directions

54 of the remote stress field, ~~with~~so that the direction of the maximum compressive stress  
55 ~~keeping~~maintains at low angle to ~~layers~~the bedding, so that the maximum stress in active fold and  
56 thrust belts may not be ~~not~~ always strictly horizontal. In fact, syn-folding layer-parallel shortening  
57 structures are reported in the folded pre-growth strata of many thrust related anticlines (e.g. Tavani  
58 et al., 2006; 2012). However, paleo-stress and/or paleo-strain indicators cannot easily and  
59 unequivocally constrain the bedding dip values range at which such stress deflection mechanism  
60 can operate (e.g. Callot et al., 2010; Beaudoin et al., 2012). In fact, almost all published datasets  
61 come uniquely from pre-growth sequences of thrust-related folds. In these cases, ~~deciphering for~~  
62 ~~which bedding dip values determining the bedding dip when~~ a given set of deformation structures  
63 are formed (i.e. fractures or slickenlines along a bedding surface) remains difficult, and any  
64 assumptions made carry along significant uncertainty.

65 On the other hand, observations made in syn-growth layers of thrust-related anticlines  
66 ~~allow~~serve to drastically reducing uncertainties related to the timing of deformation (e.g. Shackleton  
67 et al, 2005, 2011). ~~In As a matter of~~ fact, the study of growth strata sequences are by far the most  
68 commonly used approach for understanding the kinematics of fault-related folds in contractional  
69 settings (e.g. Suppe et al., 1992; Burbank et al., 1996; Ford et al., 1997; Suppe et al., 1997; Vergés  
70 et al., 2002). In contrast with the abundance of detailed geometrical studies (Suppe, 1983;  
71 Medwedeff, 1989; Mitra, 1990; Suppe and Medwedeff, 1990; Zapata and Allmendinger, 1996;  
72 Poblet et al., 1997; Suppe et al., 1997), only a few contributions dealing with the dynamics of  
73 folding inferred from syn-kinematic layers have been published (e.g. Ford et al., 1997; Nicol and  
74 Nathan, 2001; Shackleton et al., 2011; Beaudoin et al., 2015), mostly because of the lack of well-  
75 preserved and accessible exposures. In this work we have focused on the macro- and meso-  
76 structures developed within a growth strata wedge and a related major syn-kinematic unconformity  
77 exposed at the forelimb of the Sant Corneli-Bóixols anticline. Bedding-parallel shearslip occurs  
78 along pre- and syn-kinematic strata, which are oriented obliquely to each other, together with meso-  
79 scale faults cutting across strata and the unconformity. Thus, this area provides an excellent, almost

80 | unique, field example to observe, describe, and analyse how oblique anisotropies ~~oblique to each~~  
81 | ~~other~~, i.e. layers and unconformity, respond to progressive shortening and related folding in a  
82 | contractional setting. In addition, the studied area allowed us to determine the threshold dip value at  
83 | which flexural-slip is of sufficient magnitude to deflect the maximum principal stress direction from  
84 | the regional stress field.

85

## 86 | 2. Geological Setting

87 |       The Pyrenean Belt is a doubly-vergent orogenic wedge (Fig. 1a) formed during the Late  
88 | Cretaceous to Miocene subduction of the Iberian lithosphere beneath the Eurasian plate (e.g.  
89 | Choukroune et al. 1990; Muñoz, 1992; Teixell, 1998). It largely deformed and inverted the  
90 | Mesozoic extensional basins developed between Iberia and Eurasia during the Mesozoic separation  
91 | of these two plates (Muñoz, 2002). The Early Cretaceous Organyà basin is one of these basins  
92 | interposed between the Iberian plate and the exhumed mantle of the Pyrenean rift (e.g. Tugend et  
93 | al., 2014). Upon convergence and shortening, the Organyà basin was positively inverted and  
94 | incorporated into the hanging-wall of the Bóixols thrust starting on Late Cretaceous times (e.g.  
95 | Mencos et al., 2015 and references therein). The positive inversion of the inherited extensional  
96 | structures occurred under oblique, NNW-SSE oriented, convergence (Tavani et al., 2011), and was  
97 | responsible for the development of the E-W striking Sant Corneli-Bóixols anticline (Fig. 1a). The  
98 | location and geometry of this anticline is controlled by the orientation of the Early Cretaceous  
99 | extensional border fault system of the Organyà basin (e.g. Bond and McClay, 1995; García-Senz,  
100 | 2002; Mencos et al., 2015).

101 |       Several detailed studies of the stratigraphy of the Organyà basin werehave been carried out  
102 | in the last 50 years (e.g. Rosell, 1963; Garrido; 1973; Simó, 1986; Berástegui et al., 1990; García-  
103 | Senz; 2002, Mencos, 2011). The pre-rift Mesozoic stratigraphy is represented by clays and  
104 | evaporites belonging to the Triassic Keuper facies, followed by Jurassic shallow marine carbonates  
105 | and deeper water marls. The Early Cretaceous syn-rift megasequence consists of platform

106 | carbonates that thicken towards the north and transitionchange laterally (i.e. toward the north) into  
107 basinal marls (e.g. García-Senz, 2002). In the hanging-wall of the Bóixols thrust the maximum  
108 thickness of the syn-rift megasequence is about 4500m. It thins southwards around the hinge zone  
109 of the Sant Corneli-Bóixols anticline across the extensional fault system at the southern margin of  
110 the Organyà basin (Lanaja et al., 1987; Berástegui et al., 1990; Arbués et al., 1996; García-Senz,  
111 2002; Muñoz et al., 2010; Mencos et al., 2015). The Upper Cenomanian to Lower Santonian post-  
112 rift megasequence consists of carbonates with lesser clastics and can be up to 700m thick (García-  
113 Senz, 2002; Mencos, 2011). The syn-orogenic strata are exposed in the leading syncline (i.e. Tremp-  
114 Sallent Syncline) of the Sant Corneli-Bóixols anticline (Fig. 1a-b) and include more than 1000m of  
115 Upper Santonian to Paleocene deepwater to continental strata that thin abruptly to a few tens of  
116 meters northwards, i.e. towards the Sant Corneli-Bóixols anticline (e.g. Arbués et al., 1996; Roma et  
117 al. 2011).

118         In the studied area, the syn-orogenic succession can be subdivided into two units (Figs. 1b-  
119 c): (1) The lower, Upper Santonian to Campanian, Vallcarga Group (Nagtegaal, 1972) is constituted  
120 by a multilayered marine sequence of thin to medium bedded limestones and mudstones. Around  
121 the Sant Corneli-Bóixols Anticline the Vallcarga Group was deposited during folding as evidenced  
122 by growth geometries at the eastern tip of the Sant Corneli Anticline (Mencos et al., 2015).  
123 | However, no clear evidencesindications of deposition during the early stages of folding are visible  
124 in the studied area and hence it is here geometrically considered as pre-kinematic but within a  
125 regional syn-orogenic scenario. (2) The Late Campanian to Maastrichtian Areny Group (Arbués et  
126 al., 1996) is unconformably overlying the Vallcarga Group. Its thickness exceeds 1000m in the  
127 Tremp-Sallent Syncline depocentre (Fig.1a-b) but thins abruptly to a few tens of meters towards the  
128 Sant Corneli-Bóixols Anticline so it is considered to have been deposited during folding (i.e. syn-  
129 folding). The Areny Group records sedimentation in neritic to deep marine conditions coeval with  
130 the inversion and related folding of the Organyà extensional basin. The Areny Group has been  
131 divided into four sequences (A1 to A4 from older to younger; Arbués et al., 1996) and broadly

132 includes rudist accumulations and talus marls, sandstones, and re-sedimented equivalent in  
133 turbiditic facies. (3) The syn-folding Maastrichtian to Paleocene Tremp Group (Cuevas, 1992)  
134 includes continental facies associations which are commonly referred to as the Garumnian facies  
135 (Cuevas, 1992). These consist of alluvial and colluvial conglomerates and breccias, passing  
136 southwards to alluvial plain and fluvial reddish sandstones and mudstones (e.g. Arbués et al., 1996;  
137 Roma et al., 2011).

138         From a structural point of view, the major structures in the studied area are the Bóixols  
139 thrust and related splays, the E-W trending Sant Corneli-Bóixols Anticline and the associated Santa  
140 Fe Syncline to the north and the Tremp-Sallent Syncline to the south (Fig. 1a). The main ramp of  
141 the Bóixols thrust crops out in the studied area, whereas to the west and to the east it remains blind  
142 along most of the frontal limb of the Sant Corneli-Bóixols Anticline. In its exposed sector, the  
143 Bóixols thrust has Triassic to Upper Cretaceous pre-growth rocks in its hanging-wall and syn-  
144 orogenic and syn-folding strata in its footwall (Fig. 1c). A thin sheet of overturned post-rift  
145 limestones, mainly the upper Cenomanian ones, defines two thrusts. The lower thrust remains blind  
146 beneath the vertical beds of the Garumnian succession at-on the northern limb of the Sallent  
147 Syncline. The upper one thrust on the other hand truncates the Garumnian beds. This upper one is  
148 the Bóixols thrust and according to magnetostratigraphic and thermochronological studies it would  
149 have been reactivated during Paleogene times (Beamud et al., 2011). The pre-folding beds of the  
150 Vallcarga Group in the footwall of the Bóixols thrust are folded into a syncline with overturned  
151 strata immediately below the thrust fault. These strata progressively acquire sub-horizontal attitudes  
152 in the Tremp-Sallent Syncline to the south (Fig. 1c). Conversely, the unconformably overlying  
153 Areny and Tremp Groups display a series of folded structures, namely the Sant Maximí Syncline  
154 and the Tremp-Sallent Syncline, with the Remolina Anticline in between. The Remolina Anticline  
155 disappears toward the east, where the two synclines join (Fig. 1b). The three folds display a  
156 significant eastward plunge (Roma et al., 2011) of 24° with a N72° strikeplunge direction, as  
157 derived by the direction normal to the best fit plane of bedding data of the Areny Group (Fig. 1c).

158 These poles to bedding are well clustered along a great circle, thus defining the axis of a cylindrical  
159 fold. This suggests that the plunge was acquired after the deposition of the syn-folding Areny  
160 Group. In addition, it is to be noted that poles to pre-folding bedding are clustered along the same  
161 great circle, indicating that the folding axis was parallel to the intersection between the pre-  
162 unconformity beds and the unconformity (Ramsay, 1967).

163

### 164 **3. Macro- and Meso-structures**

165 In the following, we describe the structural assemblages occurring along and around the  
166 major unconformity dividing the Areny from the Vallcarga Group, i.e., the lower syn-folding strata  
167 from the upper syn-folding strata (Fig. 1d). The macro- and meso-structures are described from  
168 north to south in three sub-sections, corresponding to the three limbs of the S-shaped fold that  
169 define the Sant Maximí Syncline, the Remolina Anticline, and the Tremp-Sallent Syncline (Fig. 1).  
170 We will present and discuss stereoplots of bedding attitude, fault orientations and kinematic  
171 indicators from faults. In these stereoplots the plane normal to the structural plunge is also  
172 displayed, in order to ease the interpretation of the faults kinematics. For each stereoplot, we also  
173 show the two graphs resulting from the removal of plunge first and then of the residual bedding dip  
174 (Ramsay, 1967).

#### 175 **3.1 Northern limb**

176 InOn the inner (northern) limb of the Sant Maximí Syncline, the marls and limestones of the  
177 Vallcarga Group are overturned, while the unconformably overlying strata of the Areny Group are  
178 steeply south-dipping to near-vertical (Fig. 2). In the northern limb of the syncline, the strata of the  
179 Areny Group include siltstones, sandstones, and conglomerates belonging to the A4 sequence; the  
180 A1 to A3 sequences are missing (Fig. 2a-b), either because they were never deposited there or  
181 because they have been eroded before the deposition of the A4 sequence. Overturned bedding  
182 surfaces of the Vallcarga Group display evidence of shearingslipping. Movements along bedding are  
183 mostly toward the NW with normal sense of slip in the present overturned bedding orientation (Fig.

2b). Stereoplots show that slickenlines along bedding surfaces of the Vallcarga Group are mostly perpendicular to the local fold axis. The unconformity between the Vallcarga and the Areny Groups has been reactivated as a thrust and displays an intense S-C fabric that affects a few meters of the Vallcarga Group (Fig. 2c). Analogously to other S-C tectonites developed in carbonates and at shallow depth (e.g. Tesei et al., 2013; Vitale et al., 2014), the S-C structures found in the first 2-3 m of the Vallcarga Group immediately below the unconformity, formed as consequence of pressure-solution of marly limestones and marls, and thus indicating a ductile to brittle-ductile behaviour of the Vallcarga Group ~~in correspondence of~~ associated with this major fault. Slip directions provided by C, S and C' structures are top-to-the-NW and, similarly to the bedding-parallel slip surfaces, the average slip direction lies along the plunge-normal plane (Fig. 2c). The Areny Group conglomerates immediately above the unconformity are not affected by S-C fabric, whereas siltstones occurring a few meters above the unconformity are affected by a strong cleavage (Fig. 2d). This cleavage is at a high angle to bedding, as seen in the field and as evidenced by the fact that poles to cleavage in the stereoplot occur close to the bedding planes great circles (Fig. 2d). However, cleavage is not strictly bedding-perpendicular. Once bedding dip is restored to the horizontal, the poles to cleavage still lay lie along the plunge normal-plane and cleavage becomes SE-dipping. These relationships are indicative of a minor top-to-NW shear slip component during cleavage development. It is worth remarking that, despite the importance for stress direction reconstruction, the above described cleavage is a localised feature, which affects only the silty beds of the uppermost portion of the Areny Group in some outcrops.

### 3.2 Central limb

Immediately to the south of the axial surface of the Sant Maximí Syncline, strata of the Areny Group are shallow dipping to sub-horizontal (Fig. 1c-d). Locally, however, strata of the A4 sequence of the Areny Group are steeply north-dipping and the Sant Maximí Syncline forms a tight structure with a north-dipping to near vertical axial surface. In the hinge zone, the unconformable strata of the Areny Group are separated from the underlying overturned strata of the Vallcarga



210 | Group by a sub-horizontal [shear-slip](#) zone, which corresponds to the sheared syn-folding  
211 unconformity (Fig. 3). In addition, the sheared unconformity is offset by a series of high-angle  
212 faults that uplift the southern block (Fig. 3b). Striae along bedding surfaces of the Vallcarga Group  
213 indicate top-to-N movements with normal kinematics (Fig. 3b). Striae within the sub-horizontal  
214 [shear-slip](#) zone indicate top-to-S movement, whereas the high angle faults that offset it have  
215 slickenlines lying along the plunge-normal plane and show a top-to-N movement. A few strike-slip  
216 slickenlines also occur along high angle faults, and are indicative ~~for~~[of](#) left-lateral movements. In  
217 other places, the system of high angle reverse faults uplifting the southern limb of the Sant Maximí  
218 Syncline displays a top-to-NW movement, including some right-lateral kinematic indicators (Fig.  
219 3c). Looking at the system of high angle faults in natural cross-sections at a larger scale of  
220 observation (Fig. 3c), it is evident that these faults are approximately (i.e. angular difference is less  
221 than 10°) parallel to the [layers-bedding](#) of the Vallcarga Group, and that the amount of uplift of the  
222 southern block is [a](#) few tens of metres.

223         The uplifted southern block is well exposed at the Sallent hill (Fig. 4). There, the sub-  
224 horizontal rudist-bearing units of the Areny Group A3 sequence sit unconformable on top of the  
225 overturned north-dipping strata of the Vallcarga Group (Fig. 4a-b). Slickenlines are consistently  
226 found along the bedding surfaces of these strata. As shown in the stereoplots of Figure 4a, most of  
227 slickenlines display top-to-N normal kinematics, whereas a few are characterised by strike-slip  
228 (both left- and right-lateral) or reverse kinematics. The slickenlines displaying strike-slip and  
229 reverse kinematics postdate the top-to-N normal ones. Faults oblique to bedding have been also  
230 found in the Vallcarga Group in this area (Fig. 4a). These ~~se~~[s](#) faults are at low angle with the bedding  
231 surface and display normal and, subordinately, reverse kinematics. After bedding dip removal, both  
232 bedding-parallel [shear-slip](#) surfaces and bedding-oblique faults, show a top-to-NW [shear-slip](#) sense.  
233 As mentioned above, strata of the rudist-bearing A3 sequence are shallow dipping (Fig. 4a-b) and  
234 the unconformity between the Areny and the Vallcarga groups is also sub-horizontal. The  
235 unconformity is affected by a pervasive shear fabric (Fig. 4c) with S, C, and C' structures providing

236 a top-to-SSE shear sense. In addition, the sheared unconformity is cross-cut by SSE-dipping and  
237 NNW-verging reverse faults (Fig. 4b).

### 238 3.3 Southern limb

239 On the southern limb of the Remolina Anticline, Strata of the Areny Group are overturned  
240 to ~~mostly steeply south-dipping to the south of the Remolina Anticline, strata of the Areny Group~~  
241 ~~are overturned to mostly steeply south-dipping~~ (Fig. 5a). These strata are still unconformable on top  
242 of the overturned strata of the Vallcarga Group, but the unconformity angle between the two groups  
243 becomes significantly reduced ~~down~~ to about 20°. The unconformity preserves its stratigraphic  
244 origin and, as opposed to the northern and central limbs of the Sant Maximí syncline, no  
245 appreciable evidence of shear occurs (Fig. 5b). Instead, striae along the bedding surfaces of the  
246 Areny Group are observed (Fig. 5c). These striae indicate normal top-to-NNW and reverse top-to-  
247 NNE movements along north-dipping overturned and steeply south-dipping strata, respectively  
248 (Fig. 5c). In both cases, striae lie along the bedding surfaces at the intersection between bedding and  
249 the plunge-normal plane (Fig. 5c). Faults at a low angle to bedding have the same behaviour as the  
250 bedding: south- and north-dipping faults are reverse and normal, respectively, with slickenlines  
251 lying at the intersection between the fault and the plunge normal plane (Fig. 5c). Once bedding dip  
252 is restored to the horizontal, a top-to-NNW shearslip sense is ~~provided~~exhibited by both faults and  
253 bedding-parallel shearslip surfaces.

### 254 3.4 Structural summary

255 The deformation structures observed along and around the unconformity separating the  
256 upper syn-folding strata of the Areny Group from the underlying multilayered limestones and marls  
257 of the Vallcarga Group can be summarised as follows:

258 In the Vallcarga Group, many of the E-W striking bedding surfaces of near-vertical to  
259 overturned strata have been reactivated as shearslip surfaces. Most of these bed-parallel shearslip  
260 surfaces exhibit dip-slip kinematics, with only a few beds showing strike-slip movements. After  
261 removing the plunge of the structure and then restoring the local bedding to the horizontal, most of

the slickenlines measured along the bedding surfaces provide a [shear-slip](#) sense ranging from top-to-NW to top-to-N, with an average top-to-NNW movement. Faults are roughly E-W to WSW-ENE striking and show very low cut-off angles to bedding. After removing the fold plunge and the bedding dip, these faults provide the same top-to-NNW [shear-slip](#) sense as the bedding-parallel slickenlines. Some faults, which are presently steeply dipping to near vertical, have cut-off angles of ranging from 20° to 40° and after removing plunge and bedding dip show normal kinematics. Still, the [shear-slip](#) sense provided by them after bedding dip removal is top-to-NNW. This fault pattern and the illustrated kinematics of bedding surfaces is observed all across the studied thrust-related fold profile, i.e. in the northern, central, and southern limbs.

The syn-folding unconformity is characterised by an intense S-C fabric (showing also some C' structures) in the northern limb, and in the sub-horizontal central limb. In both cases, [shear-slip](#) direction is roughly NNW-SSE, although some strike-slip movements are occasionally observed. However, the [shear-slip](#) sense is opposite in the two limbs, being top-to-NNW in the northern limb (i.e., where the sheared unconformity strikes about E-W and has a near vertical attitude) and top-to-SSE in the central limb (i.e., where the sheared unconformity is offset by the steeply-dipping to near vertical faults surging from the underlying Vallcarga Group). Further to the south, in the southern limb of the Remolina Anticline, the unconformity shows little evidence of deformation.

Strata of the Areny Group exposed at the northern limb [of San Maximí Syncline](#) are affected by an intense cleavage at high angle to bedding. The cleavage-bedding angle is not exactly 90° however, indicating the occurrence of a top-to-NNW bedding-parallel [shear-slip](#) component. Slickenlines are observed along the bedding surfaces of the near vertical to overturned strata of the Areny Group exposed at the southern limb of the Remolina Anticline. In this area, some faults at very low angle to bedding occur. For both faults and bedding surfaces, the [shear-slip](#) sense measured after removing the plunge and the [dip of the](#) bedding is roughly top-to-NNW.

286

#### 287 4. Chronology of deformation stages

288 The syn-folding strata of the Areny Group exposed at the forelimb of the Sant Corneli-

289 | Bóixols Anticline are unconformably ~~on top of~~overlying the north-dipping overturned strata of the  
 290 pre-folding Vallcarga Group. The unconformity between both groups is clearly a syn-folding  
 291 feature. Its unconformity angle varies across the studied area, and in addition, its surface shows  
 292 unequivocal evidence of strong shearing with an average NNW-SSE-oriented shear direction. Such  
 293 a shear direction is parallel to the slip directions measured along both faults and bedding surfaces of  
 294 the Vallcarga and Areny groups. ~~However, the~~ NNW-SSE direction is not perpendicular to the  
 295 average strike of the hosting anticline ~~tough~~, although the local fold axis in the study area is WSW-  
 296 ENE striking (Fig. 1a). This structural relationship reaffirms that the E-W striking Sant Corneli-  
 297 Bóixols Anticline has developed under an oblique convergence setting where the shortening  
 298 direction was NNW-SSE (Tavani et al., 2011). In this sense, the observed meso-structures are  
 299 interpreted as developed during the growth of the Sant Corneli-Bóixols Anticline, and they cannot  
 300 be attributed to a subsequent tectonic event. The fact that these structures occur in syn-folding  
 301 strata, also rules out a pre-folding origin. In agreement with this, the observed opposite shear senses  
 302 along the unconformity surface to the north and to the south of the San Maximí Syncline axial  
 303 surface have a syn-folding origin. As illustrated in the next section these opposite senses of  
 304 shearslip can be used to unravel the kinematic evolution of the unconformity, the unconformity  
 305 angle itself and therefore that of the Sant Corneli-Bóixols Anticline.

306

## 307 5. Modelling the folding of the angular unconformity

308 | Guidelines about flexural-folding of angular unconformable sequences ~~where~~ firstly  
 309 ~~provided~~given by Alonso (1989). These include the progressive variation of the unconformity angle  
 310 during tilting of pre-unconformity layers, synchronously with progressive shearingslipping along  
 311 the unconformity surface (Alonso, 1989). Figure 6a illustrates the folding of an unconformable  
 312 sequence using a kink-band template with synclinal geometry. The position of six key points  
 313 undergoing folding is illustrated, ~~where the fixed~~ The points  $P_0$  and  $P_1$  point are fixed and inactive,  
 314 i.e. they do not move during folding and the ~~rock does not pass through them.~~ The point  $P_1$  is the  
 315 origin of our reference system. The point  $P_2$  is located at the intersection between the axial surface

316 and the unconformity and, as the axial surface moves during folding, this point is an active point  
317 that migrates through the rock. The remaining points are mobile but inactive material points, which  
318 are attached to the rock. In detail, the points  $P_3$  and  $P_5$  are attached to the base of the post-  
319 unconformity unit, while the point  $P_4$  is immediately below the unconformity, and it is attached to  
320 the layer corresponding to the stratigraphic elevation of the point  $P_0$ . The simple kink-band  
321 construction is used to quantify how the unconformity angle and the amount of shear-slip along the  
322 unconformity are modified during folding, where  $D_0$  is the initial dip of layers,  $U_0$  the initial  
323 unconformity angle,  $H_0$  the stratigraphic elevation of the unconformity, and  $L_0$  the distance from the  
324 origin of an arbitrarily placed pin line (note that the  $L_0$  parameter will disappear from the final  
325 equations used here). The X and Y coordinates of the 6 key points and the length of the segments  
326 joining them can be expressed as a function of  $L_0$ ,  $H_0$ ,  $U_0$ ,  $D_0$ , and  $D$ , as provided in figure 6b. In  
327 particular, the length of the segment joining points  $P_5$  and  $P_4$  provides the amount of shear-slip ( $\Delta S$ ,  
328 considered positive when top-to-the-hinterland), while points  $P_3$  and  $P_4$  allow calculating the  
329 unconformity angle ( $U$ ).

330 As folding takes place, the unconformity angle increases and the shear-sense of slip along  
331 the unconformity is initially top-to-the-hinterland, i.e. in the same sense as the flexural-slip along  
332 the pre-unconformity layers. When the pre-unconformity strata become overturned, the  
333 unconformity angle continues to increase and the flexural-slip in the pre-unconformity layers  
334 continues to be top-to-the-hinterland; instead the shear-sense of slip along the unconformity flips  
335 and becomes top-to-the foreland. Close to the leading syncline, i.e. along the  $P_2P_3$  segment, the  
336 sense of the incremental shear-senseslip is top-to-the-hinterland, whereas along the  $P_3P_4$  segment it  
337 becomes to top-to-the-foreland, despite the cumulative shear-senseslip may continue to be top-to-  
338 the-hinterland.

339 The relationship between  $U$ ,  $U_0$ , and  $D$  derived in figure 6b, are graphed in figure 6c. The  
340 relationships between  $U$  on  $D$  (blue lines in the figure) for different  $U_0$  values, indicate that:

341 (1) It is possible to develop overturned pre-folding strata and a nearly sub-horizontal

unconformity, as observed in the central limb of our study area, (i.e. the unconformity angle is roughly equal to the dip of the pre-unconformity layer) for a wide range of initial unconformity angles (from 30° to 90°).

(2) In order to obtain an unconformity angle of less than 20° where the pre-unconformity strata are near vertical, as observed in the northern and southern limbs of the study area, the initial unconformity angle cannot exceed 10-15°.

The predicted amount and sense of [shear<sub>slip</sub>](#) (normalised to  $H_0$ ) at different tilting stages (i.e. for different  $D$ ) and for different initial unconformity angles (i.e.  $U_0$ ) is plotted in red in figure 6c, where positive and negative values indicate top-to-the-hinterland and top-to-the-foreland [shear<sub>slip</sub>](#), respectively. For small initial unconformity angles, the unconformity angle and the cumulative top-to-the-hinterland slip along the unconformity increase during folding. This occurs until the dip of pre-growth strata attains a near-vertical attitude. From this point, further folding would imply overturning of strata and the decrease of the cumulative top-to-the hinterland slip, which eventually becomes negative (i.e. top-to-the-foreland sense), while the unconformity angle  $U$  exceeds 90°. Where the initial unconformity angle is instead close to 90°, progressive folding would imply a short period of top-to-the-foreland [shear<sub>slipping</sub>](#) along the unconformity, followed by top-to-the hinterland [shear<sub>slipping</sub>](#) when strata become nearly vertical to overturned. At this point it is important to remark that the progressive and the incremental [shear<sub>slip</sub>](#) senses do not coincide. The  $D$  value at which the cumulative [shear<sub>slip</sub>](#) passes from top to the hinterland to top-to-the-foreland largely depends on the initial unconformity angle  $U_0$ . Conversely, for an initial unconformity angle  $U_0$  between 45° to 90° the incremental [shear<sub>slip</sub>](#) changes its sign for values of  $D$  ranging from 80° to 90°, and almost regardless on  $U_0$ , value (the regions where the incremental [shear<sub>slip</sub>](#) has opposite directions are in white and grey in figure 6c).

The absence of any kinematic indicator of top-to-the-hinterland [shear<sub>slip</sub>](#) in the central limb of the study area, indicates that the initial unconformity angle had to be high at that position, and if any, the initial stage of top-to-the-hinterland [shear<sub>slipping</sub>](#) was negligible. This can be achieved when

368 the initial unconformity angle is at least 70-75°. This represents a key argument for unravelling the  
369 deformation sequence, as structures postdating the top-to-the foreland ~~shearingslipping~~ have to be  
370 interpreted as developed synchronously with layers' tilting, and in particular, as developed at least  
371 after layers have become near vertical. The top-to-the hinterland ~~shear~~slip sense and the small  
372 unconformity angle observed in the northern limb, instead, point out for a small initial unconformity  
373 angle.

374 It is worth noting that the position of the axial surface is determined by the position of  $P_0$ ,  
375 and thus by the value of  $L_0$  and  $H_0$ . These two parameters do not influence the value of the  
376 unconformity angle. Instead, the amount of slip is directly proportional to the value of  $H_0$ . However,  
377 we are interested in the sign of the slip, which is independent on  $H_0$ . In agreement, provided results  
378 are unrelated to the position of the axial surface, and thus of  $P_0$ , which can be arbitrarily set  
379 everywhere below the unconformity.

380 A cautionary note must be added for these conclusions, as they are based on a purely  
381 geometric model, in which both bed thickness and line length ~~preserves~~are preserved during  
382 folding. However, and despite the occurrence of local penetrative strain at some places (Fig. 2d),  
383 based on the field observation reported here and in Tavani et al (2011), pressure solution cleavage is  
384 an extremely localized phenomenon in this anticline, and deformation structures pointing out for  
385 folding-related bed thickness variations are not occurring. In agreement, and despite the intrinsic  
386 simplification of any geometric model, information provided by the model of figure 6 can be  
387 applied to our case study.

388

389

## 390 6. Discussion

### 391 6.1 Relative timing between ~~shearingslipping~~ and layers' tilting

392 Strata of the Vallcarga Group exposed at the forelimb of the Sant Corneli-Bóixols Anticline  
393 display a rather constant attitude, ~~-, Hh~~ however, according to the model described in figure 6,  
394 ~~shear~~slip senses and angles of the unconformity on top of these strata, indicate that the pre-

unconformity layers (i.e. the Vallcarga Group) were not homoclinally-dipping when the Areny Group was unconformably deposited on top them. The scheme of Figure 7a illustrates the present day simplified geometry of the studied structure, together with the balanced (i.e. line-length is preserved; Dahlstrom, 1969; Brandes and Tanner, 2014) reconstruction at a time immediately after the unconformity development. The reconstructed dip of pre-unconformity layers in the three limbs, is obtained according to what illustrated in section 5. As previously mentioned, the top-to-the-foreland shearing along the unconformity of the central limb has to be interpreted as occurring when strata of the Vallcarga Group attained a near-vertical to overturned attitude. On the other hand, the absence of any evidence of top-to-the-hinterland shearing along the unconformity surface at the central limb, ~~points out~~suggests that such an unconformity had to be developed when the layers of the Vallcarga Group were steeply dipping. In agreement with this, the north-dipping faults offsetting the sheared unconformity have to be regarded as syn-folding structures developed when strata of the Vallcarga Group were overturned. These 10- to 30-m spaced faults mostly consist of bedding-parallel segments (Figs. 4A and 5d), with some strands showing cut-off angles between 20° and 40° (see stereoplots of figures 3b-c), and are interpreted as flexural-slip faults, like those offsetting the topographic surface of growth folds (e.g. Burbank and Anderson, 2011; Gutiérrez et al., 2014; Li et al., 2015). These faults are therefore late-stage flexural-slip features and, as detailed in the next subsection, cannot be compatible with a sub-horizontal maximum stress.

413

## 414 6.2 Maximum stress orientation

415 The studied natural stratigraphic units includes cm to m-thick strata of limestones, marls,  
416 sandstones and conglomerates exposed across an about 500-m-wide area (Fig. 1). The large number  
417 of strata involved in the deformation, coupled with their high compositional variability, prevents the  
418 collection of a representative dataset of friction and cohesion data of both layers and interlayers. It  
419 thus makes it impossible to carry out a quantitative dynamic (i.e. stress) reconstruction. However,  
420 many stress configurations can be easily discarded, due to their kinematic inconsistency with the  
421 observed shearing pattern. In particular, we consider that the maximum paleo-stress lies on the



plane oriented perpendicular to the fault/flexural-slip plane and containing the slip direction, and forms an obtuse angle with the [shear~~slip~~](#) sense (e.g. Etchecopar et al., 1981). The following observations can thus restrict the range of possible solution and the sources of stress during folding:

(1) If we consider faults and strata in their present orientation and after plunge and bedding dip removal, the top-to-the-foreland layer-parallel [shearings~~slipping~~](#) and the south-verging reverse faulting are rare features in the northern limb of the San Maximí Syncline, which is located at a distance of less than 100 m from the Bóixols thrust. The scarcity of these structures, and the occurrence of flexural-slip surfaces forming a low angle with the thrust and having an opposite [shear~~slip~~](#) sense (i.e. normal kinematics), indicates the limited role of faulting-related stress, sourced from the process zone (e.g. Cowie and Scholz, 1992) of the upward propagating Bóixols thrust, in controlling the pattern of syn-folding [shearings~~slipping~~](#). This is contrary to what has instead been documented in other thrust-related anticlines (e.g. Bellahsen et al., 2006).

(2) The top-to-the-hinterland (i.e. top-to-the-crest of the Sant Corneli-Bóixols Anticline) layer-parallel [shearings~~slipping~~](#) observed along the bedding surfaces of the Vallcarga Group for all the three limbs has to be regarded as syn-folding. With the exception of few bedding-oblique strands of flexural-slip faults, no significant evidence of strata thinning/thickening has been observed in the Vallcarga group. This points out that, folding has been almost entirely produced by layer parallel-[shearings~~slipping~~](#) with bed-thickness preservation until late stage flexural-slip faulting took place (e.g. Donath and Parker, 1964).

(3) Deformation structures such as the layer-(nearly) parallel shortening related cleavage measured in the silty levels of the Areny Group along the axial zone of the San Maximí syncline indicate a maximum stress oriented at a low angle to bedding (Fig. 2d).

(4) The fourth key observation concerns the steeply-dipping faults, with high cutoff angles, cutting and displacing the unconformity. These faults include steps with cut-off angles of about 30° and steps parallel to the overturned bedding surfaces. Under the assumption that late-stage flexural slip faulting caused the arrest of shearing along the unconformity, a range of possible maximum stress orientation during the transition from top-to-the-foreland shearing along the unconformity to the

late-stage flexural-slip faulting can be defined for the central limb, as shown in figure 7b. The angle between the maximum stress and the bedding-parallel steps of flexural-slip faults in the Vallcarga Group is  $\alpha$ , the angle between the maximum stress and the flexural-slip fault strands oblique to bedding in the Vallcarga Group is  $\beta$ , whereas the angle between the maximum stress and the unconformity is  $\gamma$ . These three angles must be comprised between 0 and 90° to produce the observed [shear-slip](#) pattern and for it to be kinematically compatible. When using the average dip of the unconformity (i.e. 0°) and the dip of the Vallcarga Group strata in the central limb (i.e. 60° overturned), a maximum stress dip (labelled  $d\sigma_1$  in figure 7d) ranging from 30° to 90° is obtained.

At this stage one may argue that the maximum stress was inclined only during the latest stage of folding, when pre-kinematic strata were overturned, while the maximum stress was sub-horizontal during most of the folding process. Such a scenario, in which the reorientation of the maximum stress is a discontinuous process, contrasts with the fact that, in order to produce [shearingslipping](#) along bedding surfaces, the maximum stress should have been south-dipping not only when strata were 60° overturned. In fact, dip-slip [shearingslipping](#) along upright layers also requires the maximum stress to be south-dipping, and such a stress configuration can be extrapolated also for steeply (e.g. >75°) south-dipping strata. In agreement, it is intuitive the conclusion that the stress rotation was not a discontinuous process, but instead it has continuously operated during folding.

As documented in Tavani et al (2011), the layer parallel shortening pattern in the the Sant Corneli-Bóixols Anticline indicates a sub-horizontal maximum stress before folding and during the early stages of folding. As evidenced by data presented here, the stress was in a configuration not allowing [shearingslipping](#) (referring to faulting in the Vallcarga layers) during almost the entire folding process. Such stress configuration was able to produce [shearingslipping](#) along the bedding surfaces and along the unconformity, with faulting in the Vallcarga and Areny groups being almost negligible. Apart from those structures associated with the layer-parallel [shearingslipping](#), the few additional deformation structures point out for a maximum stress oriented at low angle to bedding.

474 During the late stage of folding instead, when the unconformity angle exceeded 120-130°, the  
475 maximum stress was south-dipping, with an angle higher than 30°. The stress attained a state  
476 allowing [shearingslipping](#), as faulting in the Vallcarga started. Contextually, bedding surfaces of the  
477 Vallcarga continued to be sheared, while shearing along the unconformity (in the central limb)  
478 arrested.

479

### 480 6.3 Flexural-slipping and stress reorientation

481 The information discussed above [evidencesargues](#) for a syn-folding maximum stress  
482 rotation/reorientation within the growing anticline, from sub-horizontal early-folding layer-parallel  
483 shortening in Tavani et al (2011) to south-dipping maximum stress in overturned strata documented  
484 here. As schematically illustrated in figure 7d, we infer that the sub-horizontal maximum stress  
485 applied to the leading syncline of the growing Sant Corneli-Bóixols Anticline (i.e. the remote  
486 applied stress has an andersonian compressive configuration; Anderson, 1951), progressively  
487 rotated as it was transmitted across folding rock volumes affected by widespread flexural-slipping.  
488 In agreement with what illustrated in the introduction, here this process of stress deflection is  
489 interpreted as associable with the flexural-slipping mechanism. In fact, as largely documented,  
490 [shearingslipping](#) along low-friction faults produces the perturbation of the remotely applied stress  
491 field (e.g. Pollard and Segall, 1987; Soliva et al., 2010) and, in particular, reduction of the fault-  
492 parallel shear stress component causes the orientation of principal stress to rotate locally towards a  
493 fault-parallel direction. Consistently with this, the coupling between flexural-slip and maximum  
494 stress reorientation documented in other structures, has been attributed to the fact that slipping  
495 along closely spaced low friction bedding surface imposes the maximum stress to orient at low  
496 angle to the slipping bedding surface in a wide area (i.e. the flexural-slip folded area), as mentioned  
497 in the introduction (Wiltschko et al., 1985; Ohlmacher and Aydin, 1997; Tavani et al. 2012). This  
498 concept fully applies to the data presented in this work until the strata attained a strongly overturned  
499 attitude. [The close link between flexural-slipping and stress reorientation also implies that the](#)

500 amount of deflection of the maximum compressive stress scales with the amount of flexural-  
501 slipping. Accordingly, if the growth of an anticline occurs in a discontinuous fashion, the  
502 orientation of maximum compressive stress is expected to rotate repeatedly during the repeated  
503 pulses of flexural slip. In the case documented here, the absence of any indicators of a sub-  
504 horizontal maximum stress could be related to the fact that andersonian stress configuration would  
505 characterise stages in which the maximum stress is low and in a sub-critical state, not allowing  
506 faulting and folding. Repeated pulses of maximum stress increase would instead cause the  
507 progressive slipping of bedding surfaces, with the consequent maximum stress deflection.

508 |

509 |

## 510 Conclusions

511       The key questions in this study were to constrain up to the range of dip values over which  
512 the flexural slip mechanism can operate.. This fundamental information allows to discriminate  
513 whether flexural-slipping is a nearly passive process with respect to the stress field evolution (i.e.  
514 the remotely applied stress is only locally deflected) or rather, it is a fully active process,  
515 discontinuous at the local scale but sufficiently dense in time and space at the scale of the fold, able  
516 to reorient the remotely applied stress field. The answer is that flexural-slip in the studied structures  
517 was an active process. It operated up to 120° of dip and caused the maximum stress to progressively  
518 reorient at low angle to bedding until strata attained an overturned attitude.

519

520

## 521 Acknowledgments

522 | The authors sincerely thanks the reviewers, Ryan Shackleton, [Richard Lisle](#), and Juliet Crider, and  
523 the editors, for their constructive comments and suggestions. All the structural data and the  
524 photographs presented in this work can be obtained from the corresponding author. The cross  
525 sections presented in this work have been constructed using the 3D Move software. This work is a  
526 contribution of the Institut de Recerca Geomodels and the Geodinàmica i Anàlisi de Conques

527 research group (2014SGR467SGR) from the Agència de Gestió d'Ajuts Universitaris i de Recerca  
528 (AGAUR) and the Secretaria d'Universitats i Recerca del Departament d'Economia i Coneixement  
529 de la Generalitat de Catalunya. Move restoration software was used for cross-section construction.

530

## 531 **Captions**

### 532 **Figure 1**

533 (A) Geological maps of eastern Pyrenees, with detail of the Sant Corneli-Bóixols Anticline.  
534 Geological map (B) and schematic cross-section (C) of the study area, with cumulative contouring  
535 of poles to bedding and best-fit beta axis of syn-folding beds, and poles of pre-folding beds (red  
536 circles). (D) Panoramic view of the study area, with insets showing the location of figures 2 to 4 and  
537 the photographed area in cross-section and map-view, respectively.

538

### 539 **Figure 2**

540 Structures exposed at the northern limb of the San Maximí Syncline. (A) Cross-sectional location of  
541 the site. (B) South-dipping conglomerates of the Areny Group unconformably overlying the  
542 overturned north-dipping strata of the Vallcarga Group, with stereoplots of the unconformity and  
543 bedding surfaces in the Vallcarga Group. (C) Detail of the unconformity, showing S-C-C' fabric,  
544 with corresponding stereoplots. (D) South-dipping alternating conglomerates and siltstones of the  
545 Areny Group, with pervasive cleavage at high angle to bedding.

546

### 547 **Figure 3**

548 Transitional area between the San Maximí Syncline and the Remolina Anticline. (A) Cross-  
549 sectional location of the site. (B) Shallow-dipping unconformity between the Areny and the  
550 Vallcarga groups reactivated as a low-angle fault and displaced by a high-angle fault. Details of the  
551 low- and high-dipping faults are shown, together with stereoplots of faults and bedding surfaces of  
552 the Vallcarga Group. (C) Panoramic view and stereoplot of a near vertical fault system uplifting the

553 Remolina Anticline, which has folded strata of the Areny Group unconformably on top of near  
554 vertical strata of the Vallcarga Group.

555

#### 556 **Figure 4**

557 Macro- and meso-structures of the Remolina Anticline. (A) Panoramic view and line-drawing of the  
558 Remolina Anticline (with insets showing the location of figure 4B and C, and figure 5B), with  
559 stereoplots of faults and bedding measured in the Vallcarga Group. (B) Detail of a south-dipping  
560 reverse fault having in its footwall sub-horizontal carbonates of the Areny Group on top of  
561 overturned strata of the Vallcarga Group. Stereoplots show fault data in the Areny carbonates. (C)  
562 Details of the unconformity, with S-C-C' illustrated and plotted.

563

#### 564 **Figure 5**

565 (A) Panoramic view of the hinge zone of the Remolina anticline, visible in the Areny strata that are  
566 on top of constantly-dipping strata of the Vallcarga Group. (B) Detail of the unconformity between  
567 Areny and Vallcarga groups at the southern limb of the anticline, where no evidence of shear  
568 occurs. (C) Detail of slickenlines along a near vertical bedding surface of the Areny strata,  
569 providing a top to the north [shear-slip](#) sense for the upper bed. (D) Stereoplots of bedding surfaces  
570 and faults collected in the Areny Group strata of the southern limb of the Remolina Anticline.

571

#### 572 **Figure 6**

573 (A) Evolving angular relationships between unconformable sequences during flexural-folding in the  
574 inner limb of a syncline, with [incremental shear-slip](#) senses along pre-unconformity layers and along  
575 the unconformity indicated, for different initial unconformity angles. The position of six [key](#)-points  
576 undergoing folding is illustrated, as well as the dip of pre-unconformity layers ( $D$ ) and of the  
577 unconformity angle ( $U$ ), which is the angle between the unconformity and the underlying layers.  
578 (B) X and Y coordinates of the six points of figure 6a, with length of segments, and derived amount

579 of [shear](#)[slip](#) along the unconformity ( $\Delta S$ ) and unconformity angle ( $U$ ). (C) Graphical solution of  
580 equations in figure 6b. Blue lines relate the unconformity angle ( $U$ ) to the dip of pre growth strata  
581 ( $D$ ) for different initial unconformity angle ( $U_0$ ). Red lines relates the normalised [shear](#)[slip](#) along the  
582 unconformity in the inner portion (i.e.  $\Delta S = P_4P_5$  segment divided  $H$ ) to  $D$ , for different initial  
583 unconformity angle ( $U_0$ ). Notice that the Y axis for red lines is on the right and that positive and  
584 negative values are flipped. The lines indicate the cumulative [shear](#)[slip](#) along the unconformity,  
585 while the grey area bordered by the black line, indicate the area where the incremental [shear](#)[slip](#) is  
586 negative.

587

## 588 **Figure 7**

589 (A) Scheme showing the present day geometry of the frontal limb of the Sant Corneli-Bóixols  
590 Anticline. (B) Details showing the structural assemblages observed at the Remolina Anticline, with  
591 two alternative configurations for the maximum stress orientation. The maximum stress forms the  
592 following clockwise angles:  $d\sigma_1$  with the horizontal,  $\gamma$  with the unconformity,  $\alpha$  with the bedding-  
593 parallel steps of flexural-slip faults in the Vallcarga Group,  $\beta$  with the oblique to bedding strands of  
594 the flexural-slip fault in the Vallcarga Group. Red and cyan colours indicate angles not compatible  
595 and compatible with the observed [shear](#)[slip](#) pattern, respectively. (C) Relationships between  $d\sigma_1$  and  
596  $\alpha$ ,  $\beta$ , and  $\gamma$ , with the red area indicating the orientation of the maximum stress not compatible with  
597 the [shear](#)[slip](#) pattern observed at the Remolina Anticline. (D) Inferred maximum stress trajectories  
598 during the late stages of folding.

599

## 600 **References**

601 Alonso, J.L., 1989. Fold reactivation involving angular unconformable sequences: theoretical  
602 analysis and natural examples from the Cantabrian Zone (Northwest Spain). *Tectonophysics*,  
603 170, 57-77.  
604 Anderson E.M., 1951. *The Dynamics of Faulting*. Oliver and Boyd, Edinburgh.

605 Arbués, P., Pi, E., Berástegui, X., 1996. Relaciones entre la evolución sedimentaria del Grupo de  
 606 Arén y el cabalgamiento de Bóixols (Campaniense terminal-Maastrichtiense del Pirineo  
 607 meridional-central). *Geogaceta*, 20, 446-449.

608 Balsamo, F., Clemenzi, L., Storti, F., Mozafari, M., Solum, J., Swennen, R., Taberner, C.,  
 609 Tueckmantel, C. 2016. Anatomy and paleofluid evolution of laterally restricted extensional  
 610 fault zones in the Jabal Qusaybah anticline, Salakh arch, Oman. *Geological Society of*  
 611 *America Bulletin*, 128(5-6), 957-972.

612 Beamud, E., Muñoz, J.A., Fitzgerald, P.G., Baldwin, S.L., Garcés, M., Cabrera, L., Metcalf, J.R.,  
 613 2011. Magnetostratigraphy and detrital apatite fission track thermochronology in syntectonic  
 614 conglomerates: constraints on the exhumation of the South-Central Pyrenees. *Basin Research*  
 615 23, 309-331.

616 Beaudoin, N., Leprêtre, R., Bellahsen, N., Lacombe, O., Amrouch, K., Callot, J.P., Emmanuel, L.,  
 617 Daniel, J.M., 2012. Structural and microstructural evolution of the Rattlesnake Mountain  
 618 Anticline (Wyoming, USA): new insights into the Sevier and Laramide orogenic stress build-  
 619 up in the Bighorn Basin. *Tectonophysics* 576, 20-45.

620 Belayneh, M., Cosgrove, J.W., 2004. Fracture-pattern variations around a major fold and their  
 621 implications regarding fracture prediction using limited data: an example from the Bristol  
 622 Channel Basin. *Geological Society, London, Special Publications*, 231, 89-102.

623 Bellahsen, N., Fiore, P.E., Pollard, D.D., 2006. From spatial variation of fracture patterns to fold  
 624 kinematics: A geomechanical approach. *Geophysical Research Letters*, 33, L02301,

625 Berástegui, X., García-Senz, J.M., Losantos, M., 1990. Tecto-sedimentary evolution of the Organya  
 626 extensional basin (central south Pyrenean unit, Spain) during the Lower Cretaceous. *Bulletin*  
 627 *de la Societe Geologique de France*, 8, 251-264,

628 Bond, R.M.G., McClay, K.R., 1995. Inversion of a Lower Cretaceous extensional basin, south  
 629 central Pyrenees, Spain. *Geological Society, London, Special Publications*, 88, 415-431.

630 Brandes, C., Tanner, D.C., 2014. Fault-related folding: A review of kinematic models and their



631 application. *Earth-Science Reviews*, 138, 352-370.

632 Burbank, D., Meigs, A., Brozović, N., 1996. Interactions of growing folds and coeval depositional  
633 systems. *Basin Research*, 8, 199-223.

634 Burbank, D.W., Anderson, R.S., 2011. *Tectonic geomorphology*. Blackwell, Oxford.

635 Callot, J.P., Robion, P., Sassi, W., Guiton, M.L.E., Faure, J.-L., Daniel, J.M., Mengus, J.-M.,  
636 Schmitz, J., 2010. Magnetic characterisation of folded aeolian sandstones: Interpretation of  
637 magnetic fabrics in diamagnetic rocks. *Tectonophysics*, 495, 230-245.

638 Choukroune, P., Roure, F., Pinet, B., 1990. Main results of the ECORS Pyrenees profile.  
639 *Tectonophysics*, 173, 411-423

640 Cowie, P.A., Scholz, C.H., 1992. Displacement-length scaling relationship for faults: data synthesis  
641 and discussion. *Journal of Structural Geology*, 14, 1149-1156.

642 Cuevas, J.L., 1992. Estratigrafía del "Garumniense" de la Conca de Tremp. Prepirineo de Lérida.  
643 *Acta geológica hispánica*, 27, 95-108.

644 Dahlstrom, C.D.A., 1969. Balanced cross sections. *Can. J. Earth Sci.* 6, 743-757.

645 Donath, F.A., Parker, R.B., 1964. Folds and folding. *Geol. Soc. Am. Bull.*, 75, 45-62.

646 Etchecopar, A., Vasseur, G., Daignieres, M., 1981. An inverse problem in microtectonics for the  
647 determination of stress tensors from fault striation analysis. *Journal of Structural Geology*, 3,  
648 51-65.

649 Engelder, T., Geiser, P., 1980. On the use of regional joint sets as trajectories of paleostress fields  
650 during the development of the Appalachian plateau, New York. *Journal of Geophysical*  
651 *Research*, 85, 6319-6341.

652 Erslev, E.A., Mayborn, K.R., 1997. Multiple geometries and modes of fault-propagation folding in  
653 the Canadian thrust belt. *J. Struct. Geol.*, 19, 321-335.

654 Fischer, M.P., Wilkerson, M.S., 2000. Predicting the orientation of joints from fold shape: results of  
655 pseudo-three-dimensional modeling and curvature analysis. *Geology* 28, 15-18.

656 Ford, M., Williams, E. A., Artoni, A., Vergés, J., Hardy, S., 1997. Progressive evolution of a fault-

657 related fold pair from growth strata geometries, Sant Llorenç de Morunys, SE Pyrenees.  
658 Journal of structural Geology, 19, 413-441.

659 Fowler, T.J., 1996. Flexural-slip generated bedding-parallel veins from central Victoria, Australia.  
660 Journal of Structural Geology, 18, 1399-1415.

661 García-Senz, J., 2002. Cuencas extensivas del Cretácico Inferior en los Pirineos centrales.  
662 Formación y subsecuente inversión. PhD Thesis, pp. 310. Universitat de Barcelona.

663 Garrido, A., 1973. Estudio geológico y relacion entre tectónica y sedimentación del Secundario y  
664 Terciario de la vertiente meridional Pirenaica en su zona central. PhD Thesis, pp. 395,  
665 Universidad de Granada.

666 Gutiérrez, F., Carbonel, D., Kirkham, R. M., Guerrero, J., Lucha, P., Matthews, V. 2014. Can  
667 flexural-slip faults related to evaporite dissolution generate hazardous earthquakes? The case  
668 of the Grand Hogback monocline of west-central Colorado. Geological Society of America  
669 Bulletin, 126, 1481-1494.

670 Hancock, P.L., 1985. Brittle microtectonics: principles and practice. J. Struct. Geol. 7, 437-457.

671 Lacombe, O., 2012. Do fault slip data inversions actually yield “paleostresses” that can be  
672 compared with contemporary stresses? A critical discussion. Comptes Rendus Geoscience,  
673 344, 159-173.

674 Laubach, S.E., 1989. Paleostress directions from the preferred orientation of closed microfractures  
675 (fluid-inclusion planes) in sandstone, East Texas basin, U.S.A., Journal of Structural Geology,  
676 11, 15, 603-611.

677 Lanaja, J.M., 1987. Contribución de la exploración petrolífera al conocimiento de la geología de  
678 España. pp. 465. IGME, Madrid.

679 Li, T., Chen, J., Thompson, J. A., Burbank, D. W., Yang, X., 2015. Active flexural-slip faulting: A  
680 study from the Pamir-Tian Shan convergent zone, NW China. Journal of Geophysical  
681 Research: Solid Earth, 120, 4359-4378.

682 Lisle, R.J., 1994. Detection of zones of abnormal strains in structures using Gaussian curvature

analysis. AAPG Bull., 78, 1811-1819.

Medwedeff, D.W., 1989. Growth fault-bend folding at southeast Lost Hills, San Joaquin Valley, California. Bulletin of the American Association of Petroleum Geologists, 73, 54-67

Mencos, J., 2011. Metodologies de reconstrucció i modelització 3D d'estructures geològiques: anticlinal de Sant Corneli-Bóixols (Pirineus centrals). PhD Thesis, pp. 277. Universitat de Barcelona.

Mencos, J., Carrera, N., Muñoz, J.A., 2015. Influence of rift basin geometry on the subsequent postrift sedimentation and basin inversion: The Organyà Basin and the Bóixols thrust sheet (south central Pyrenees). Tectonics, 34, 1452-1474. doi: 10.1002/2014TC003692.

Mitra, S., 1990. Fault-propagation folds: geometry, kinematic evolution, and hydrocarbon traps. AAPG Bull. 74, 921-945.

Muñoz, J.A., 1992. Evolution of a continental collision belt: ECORS-Pyrenees crustal balanced cross-section. In *Thrust tectonics*, K.R. McClay ed., pp. 235-246, Chapman & Hall, London.

Muñoz, J.A., 2002. The Pyrenees. In *The Geology of Spain*, W. Gibbons and T. Moreno eds., 370-385, Geological Society, London.

Muñoz, J.A., Carrera, N., Mencos, J., Beamud, B., Perea, H., Arbués, P., Rivas, G., Bausà J., Garcia-Senz, J., 2010. *Cartografia geològica del substrat prequaternari*. Map 252-2-2 (66–22), Aramunt scale 1: 25000, Institut Cartogràfic de Catalunya (ICC), Servei Geològic de Catalunya (IGC), Barcelona.

Nagtegaal, P.J.C., 1972. Depositional history and clay minerals of the Upper Cretaceous basin in the South-Central Pyrenees, Spain. Leidse Geologische Mededelingen, 47, 251-275.

Nicol, A., Nathan, S., 2001. Folding and the formation of bedding-parallel faults on the western limb of Grey Valley Syncline near Blackball, New Zealand. New Zealand Journal of Geology and Geophysics, 44, 127-135.

Ohlmacher, G.C., Aydin, A., 1997. Mechanics of vein, fault and solution surface formation in the Appalachian Valley and Ridge, northeastern Tennessee, USA: implications for fault friction,

709 state of stress and fluid pressure. *J. Struct. Geol.* 19, 927–944.

710 Poblet, J., Storti, F., McClay, K., Muñoz, J.A., 1997. Geometries of syntectonic sediments  
711 associated with single-layer detachment folds. *Journal of Structural Geology*, 19, 369-381.

712 Pollard, D.D., Segall, P., 1987. Theoretical displacements and stresses near fractures in rock: with  
713 applications to faults, joints, veins, dikes, and solution surfaces. *Fracture mechanics of rock*.  
714 Academic Press. London

715 Price, N.J., Cosgrove, J.W., 1990. *Analysis of Geological Structures*.

716 Ramsay, J.G., 1967. *Folding and Fracturing of Rocks*. McGraw-Hill, New York.

717 Roma, M., Arbués, P., Granado, P., Gratacós, O., Muñoz, J.A., 2011. The Sallent growth strata: an  
718 example of complex fold amplification mechanisms interacting with deepwater to continental  
719 sedimentation (South-Central Pyrenees, Spain). Abstracts with Poster, T4b. Sedimentation and  
720 Tectonics, 28th IAS Meeting of Sedimentology 2011

721 Rosell, J., 1963. Sobre la existencia de la discordancia precenomaniense en el Pirineo de la  
722 provincia de Lerida. *Notas y Comunicaciones del Instituto Geológico y Minero de España*,  
723 72, 71-80.

724 Shackleton, J.R., Cooke, M.L., Sussman, A.J., 2005. Evidence for temporally changing mechanical  
725 stratigraphy and effects on joint-network architecture. *Geology*, 33, 101-104.

726 Shackleton, J.R., Cooke, M.L., Vergés, J., Simó, T., 2011. Temporal constraints on fracturing  
727 associated with fault-related folding at Sant Corneli anticline, Spanish Pyrenees. *J. Struct.*  
728 *Geol.* 33, 5-19.

729 Simó, A. 1986. Carbonate platform depositional sequences, Upper Cretaceous, South Central  
730 Pyrenees (Spain). *Tectonophysics*, 129, 205-231.

731 Soliva, R., Maerten, F., Petit, J. P., Auzias, V., 2010. Field evidences for the role of static friction on  
732 fracture orientation in extensional relays along strike-slip faults: Comparison with  
733 photoelasticity and 3-D numerical modeling. *Journal of Structural Geology*, 32, 1721-1731.

734 Suppe, J., 1983. Geometry and kinematics of fault–bend folding. *Am. J. Sci.*, 283, 684-721.

735 Suppe, J., Medwedeff, D.A., 1990. Geometry and kinematics of fault-propagation folding. *Eclogae*  
736 *Geol. Helv.* 83, 409-454.

737 Suppe, J., Chou, G.T., Hook, S.C., 1992. Rates of folding and faulting determined from growth  
738 strata. In *Thrust tectonics*, K.R. McClay ed., pp. 105-121. Chapman & Hall, London.

739 Suppe, J., Sàbat, F., Muñoz, J. A., Poblet, J., Roca, E., Vergés, J., 1997. Bed-by-bed fold growth by  
740 kink-band migration: Sant Llorenç de Morunys, eastern Pyrenees. *Journal of Structural*  
741 *Geology*, 19, 443-461.

742 Tanner, P.W., 1989. The flexural-slip mechanism. *J. Struct. Geol.* 11, 635-655.

743 Tavani, S., Storti, F., Fernández, O., Muñoz, J.A., Salvini, F., 2006a. 3-D deformation pattern  
744 analysis and evolution of the Anisclo anticline, southern Pyrenees. *J. Struct. Geol.* 28, 695-  
745 712.

746 Tavani, S., Mencos, J., Bausà, J., Muñoz, J.A., 2011. The fracture pattern of the Sant Corneli  
747 Bóixols oblique inversion anticline (Spanish Pyrenees). *J. Struct. Geol.* 33, 1662-1680.

748 Tavani, S., Storti, F., Bausà, J., Muñoz, J.A., 2012. Late thrusting extensional collapse at the  
749 mountain front of the northern Apennines (Italy). *Tectonics* 31 (4), TC4019.

750 Tavani, S., Storti, F., Lacombe, O., Corradetti, A., Muñoz, J. A., Mazzoli, S., 2015. A review of  
751 deformation pattern templates in foreland basin systems and fold-and-thrust belts:  
752 Implications for the state of stress in the frontal regions of thrust wedges. *Earth-Science*  
753 *Reviews*, 141, 82-104.

754 Teixell, A., 1998. Crustal structure and orogenic material budget in the west central Pyrenees.  
755 *Tectonics*, 17, 395-406.

756 Tesei, T., Collettini, C., Vitić, C., Barchi, M.R., 2013. Fault architecture and deformation  
757 mechanisms in exhumed analogues of seismogenic carbonate-bearing thrusts. *Journal of*  
758 *Structural Geology*, 55, 167–181

759 Tugend, J., Manatschal, G., Kuszniir, N. J., Masini, E., Mohn, G., Thionon, I., 2014. Formation and  
760 deformation of hyperextended rift systems: Insights from rift domain mapping in the Bay of

761 Biscay-Pyrenees. *Tectonics*, 33(7), 1239-1276.

762 Vergés, J., Fernández, M., Martínez, A., 2002. The Pyrenean orogen: pre-, syn-, and post-collisional  
763 evolution. *Journal of the Virtual Explorer*, 8, 57-76.

764 Wiltschko, D.V., Medwedeff, D.A., Millson, H.E., 1985. Distribution and mechanisms of strain  
765 within rocks on the northwest ramp of Pine Mountain block, southern Appalachian foreland: a  
766 field test of theory. *Geological Society of America Bulletin*, 96, 426-435.

767 Vitale, S., Zaghloul, M.N., Tramparulo, F.D.A, El Ouaragli, B., 2014. Deformation characterization  
768 of a regional thrust zone in the northern Rif (Chefchaouen, Morocco). *Journal of*  
769 *Geodynamics*, 77, 22-38

770 Zapata, T.R., Allmendinger, R.W., 1996. Growth stratal records of instantaneous and progressive  
771 limb rotation in the Precordillera thrust belt and Bermejo basin, Argentina. *Tectonics*, 15,  
772 1065-1083

773

774
